# Supplementary material for: Self-assembly of C4H-type hydrogenated graphene
Source: Royal Society of Chemistry journal article supplement (doi:10.1039/c3nr03558a), 2013-01-01
Supplement: c3nr03558a.pdf [file c3nr03558a.pdf]

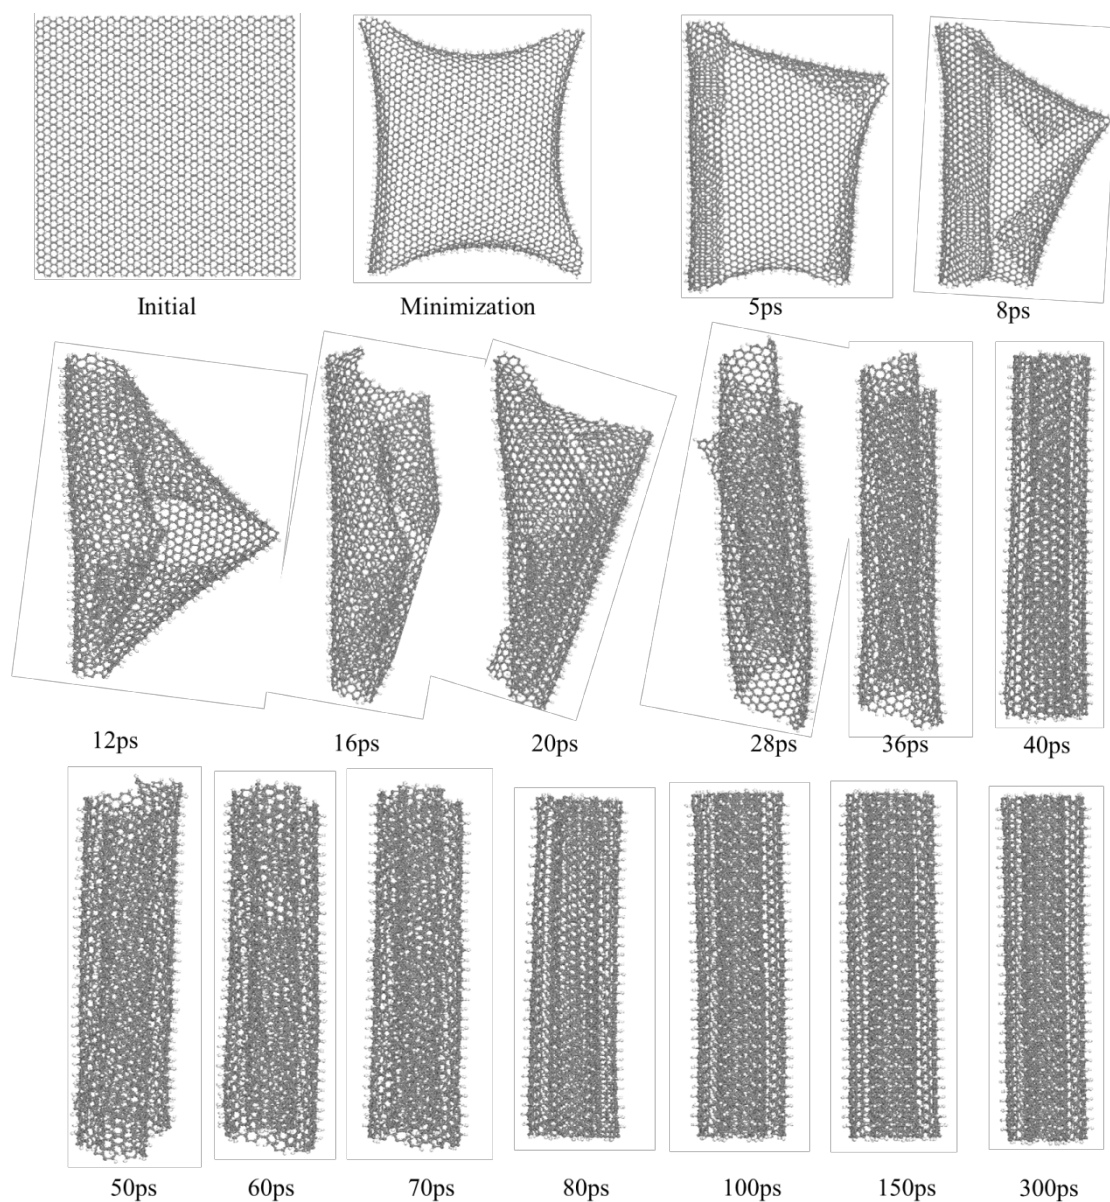

Fig. F1 shows the trajectories process of the self-assembly of  $C_4H$  from the initial sheet and after minimization to a stable state.
